# Supplementary material for: Probing the nature of intramolecular (sp3)C–H⋯Cu(i) interactions in organo thione copper(i) cages
Source: Royal Society of Chemistry journal article supplement (doi:10.1039/d4dt03294b), 2025-01-01
Supplement: d4dt03294b1.pdf [file d4dt03294b1.pdf]

## Supporting information

### Probing the Nature of Intramolecular ( $sp^3$ )C-H $\cdots$ Cu(I) Interactions in Organo Thione Copper(I) Cages

Girbide Amitkumar Ramakant<sup>#,a</sup>, Gopendra Muduli<sup>#,a</sup>, Rakesh Kumar Rai, and Ganesan Prabusankar<sup>\*,a</sup>

[a] Girbide Amitkumar Ramakant, Mr. Gopendra Muduli, Mr. Rakesh Kumar Rai, and Prof. Ganesan Prabusankar, Organometallics, and Materials Chemistry Lab, Department of Chemistry, Indian Institute of Technology Hyderabad, Kandi, Sangareddy, Telangana, India-502285 E-mail: prabu@chy.iith.ac.in

<sup>#</sup>Equal contribution

| <b>Table of Content</b>                                                                                                                                           |    |
|-------------------------------------------------------------------------------------------------------------------------------------------------------------------|----|
| <b>Figure S1.</b> $^1\text{H}$ NMR spectrum of <b>L</b> <sup>1</sup> in $\text{CDCl}_3$ at 25 °C                                                                  | 3  |
| <b>Figure S2.</b> $^{13}\text{C}$ NMR spectrum of <b>L</b> <sup>1</sup> in $\text{CDCl}_3$ at 25 °C                                                               | 4  |
| <b>Figure S3.</b> FT-IR spectrum of <b>L</b> <sup>1</sup> at 25 °C                                                                                                | 5  |
| <b>Figure S4.</b> $^1\text{H}$ NMR spectrum of <b>1</b> in $\text{DMSO}-d_6$ at 25 °C                                                                             | 6  |
| <b>Figure S5.</b> $^{13}\text{C}$ NMR spectrum of <b>1</b> in $\text{DMSO}-d_6$ at 25 °C                                                                          | 7  |
| <b>Figure S6.</b> $^1\text{H}$ NMR spectrum of <b>2</b> in $\text{DMSO}-d_6$ at 25 °C                                                                             | 8  |
| <b>Figure S7.</b> $^{13}\text{C}$ NMR spectrum of <b>2</b> in $\text{DMSO}-d_6$ at 25 °C                                                                          | 9  |
| <b>Figure S8.</b> $^1\text{H}$ NMR spectrum of <b>2</b> in $\text{DMSO}-d_6$ at variable temperature.                                                             | 10 |
| <b>Figure S9.</b> FT-IR spectrum of <b>1</b> at 25 °C                                                                                                             | 11 |
| <b>Figure S10.</b> FT-IR spectrum of <b>2</b> at 25 °C                                                                                                            | 12 |
| <b>Figure S11.</b> FT-IR spectrum of <b>L</b> <sup>1</sup> <b>S</b> , <b>1</b> and <b>2</b> at 25 °C.                                                             |    |
| <b>Figure S12.</b> HAR-refined molecular structure of <b>2</b> with the PBE/def2-TZVPP model at full resolution 120 K.                                            | 14 |
| <b>Figure S13.</b> Fourier difference electron density maps showing the electron density associated with the H-atom and Cu-atom in Cu...H-C interaction at 120 K. | 15 |
| <b>Table S1:</b> The structural parameters of <b>1</b> and <b>2</b> .                                                                                             | 16 |
| <b>Table S2:</b> The structural parameters of <b>1</b> and <b>2</b> at 120K                                                                                       | 17 |
| <b>Table S3:</b> Selective bond lengths and bond angles of <b>2</b> at 120K (H atoms anisotropic refinement using NoSpherA2 in Olex2).                            | 10 |
| Computational Methods                                                                                                                                             | 19 |
| <b>Table S4:</b> Optimized Cartesian Co-ordinates of <b>2</b> (Cartesian coordinates of the optimized structures (in Å).                                          | 20 |

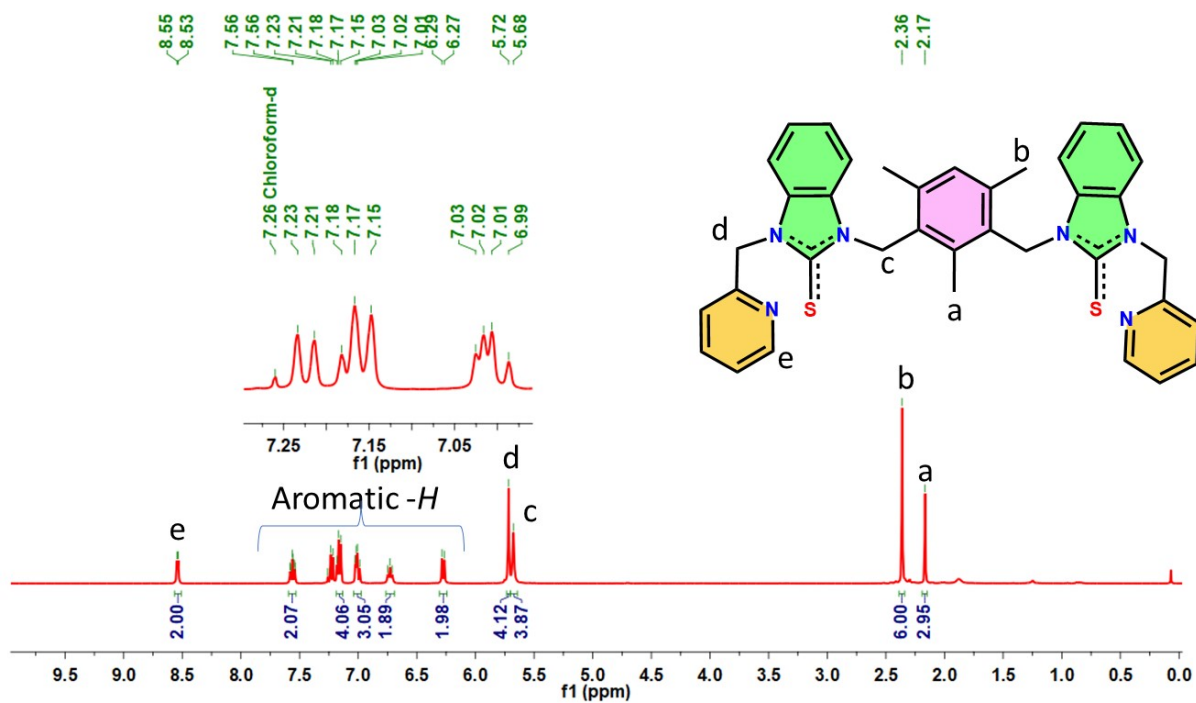

Figure S1.  $^1\text{H}$  NMR spectrum of  $\text{L}^1$  in  $\text{CDCl}_3$  at  $25^\circ\text{C}$

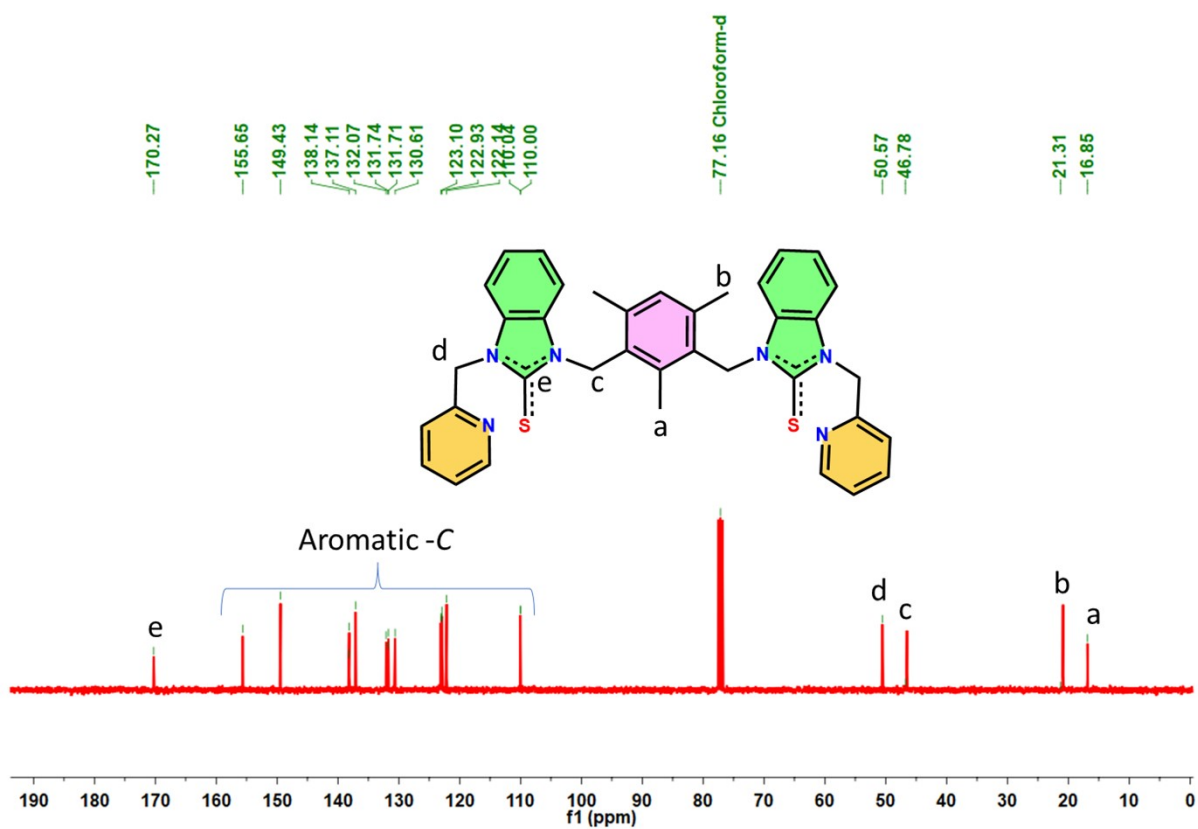

Figure S2.  $^{13}\text{C}$  NMR spectrum of  $\text{L}^1$  in  $\text{CDCl}_3$  at  $25\text{ }^\circ\text{C}$ .

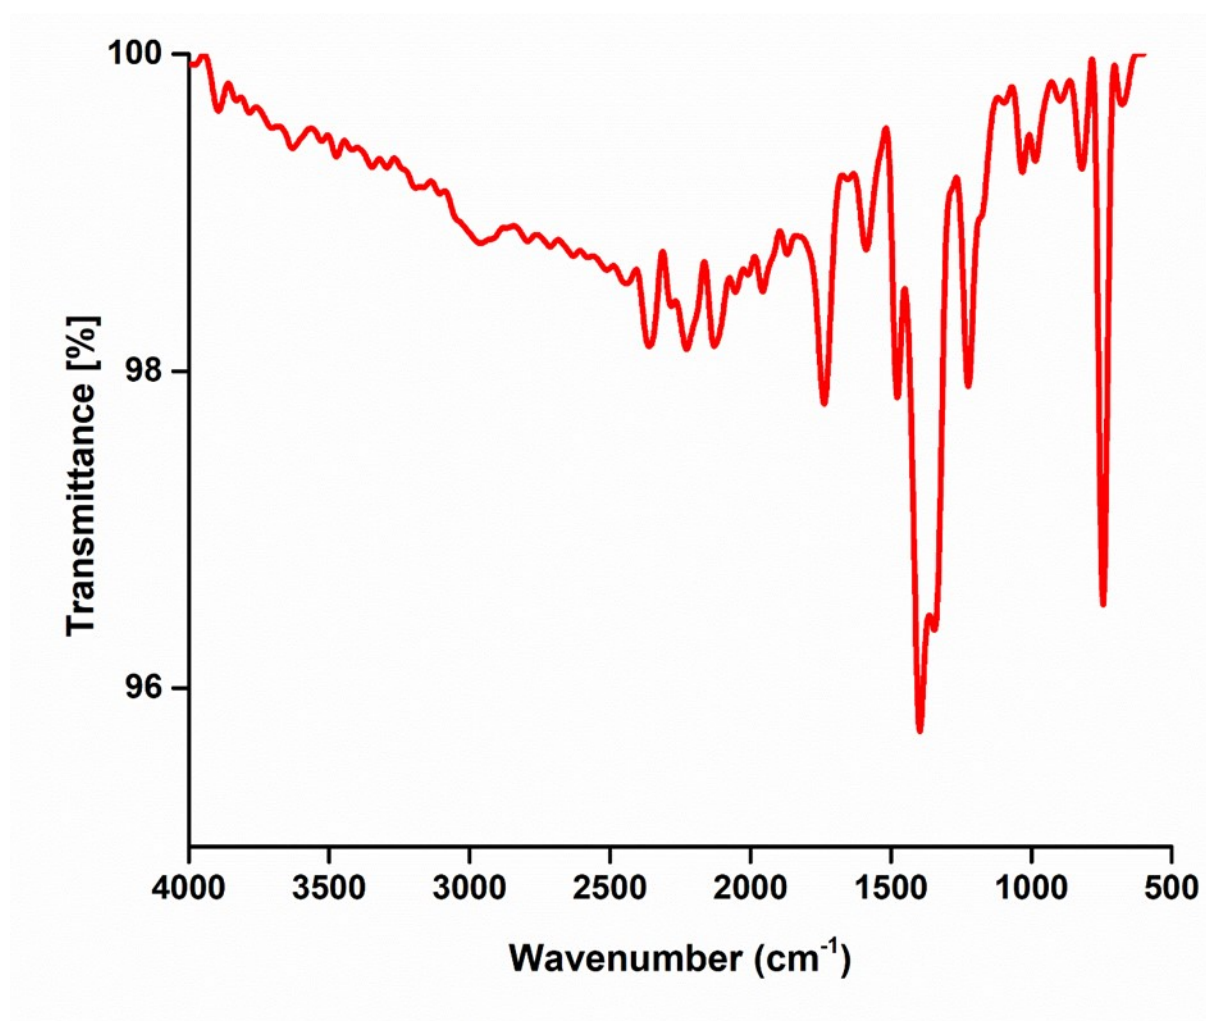

**Figure S3:** FT-IR spectrum of L<sup>1</sup> at 25 °C.

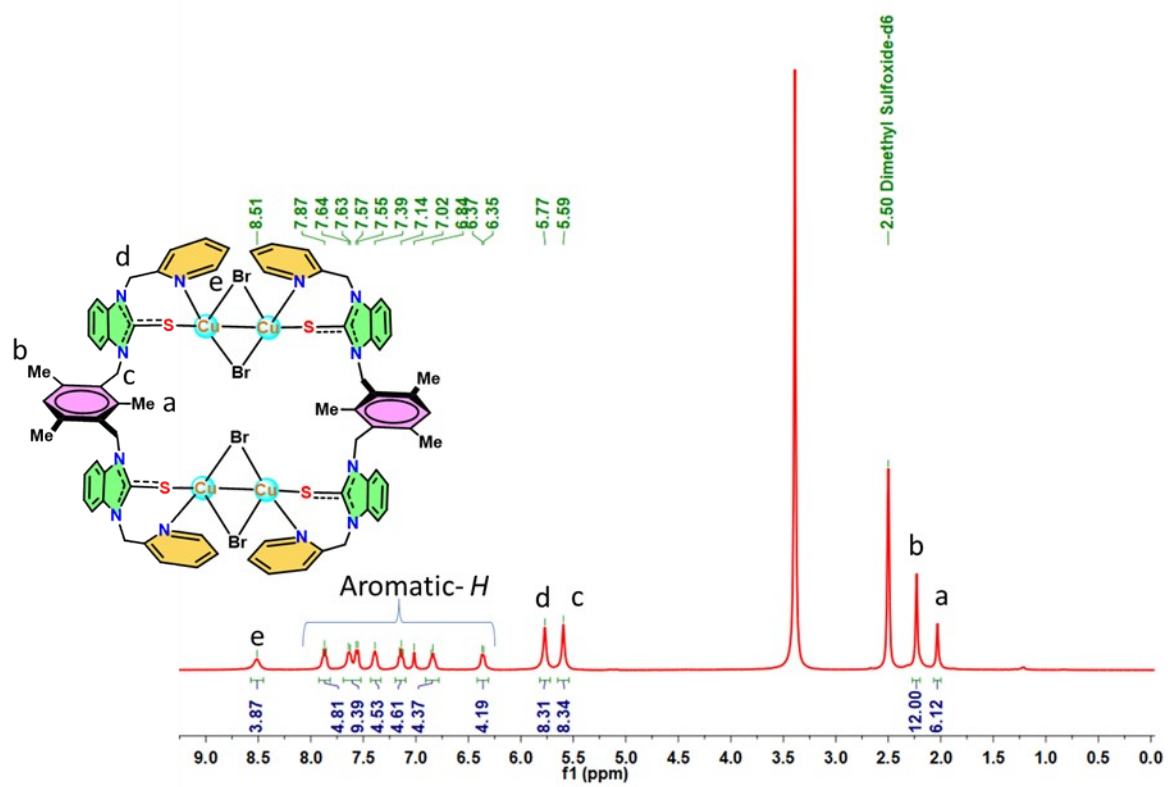

Figure S4. <sup>1</sup>H NMR spectrum of **1** in DMSO-*d*<sub>6</sub> at 25 °C.

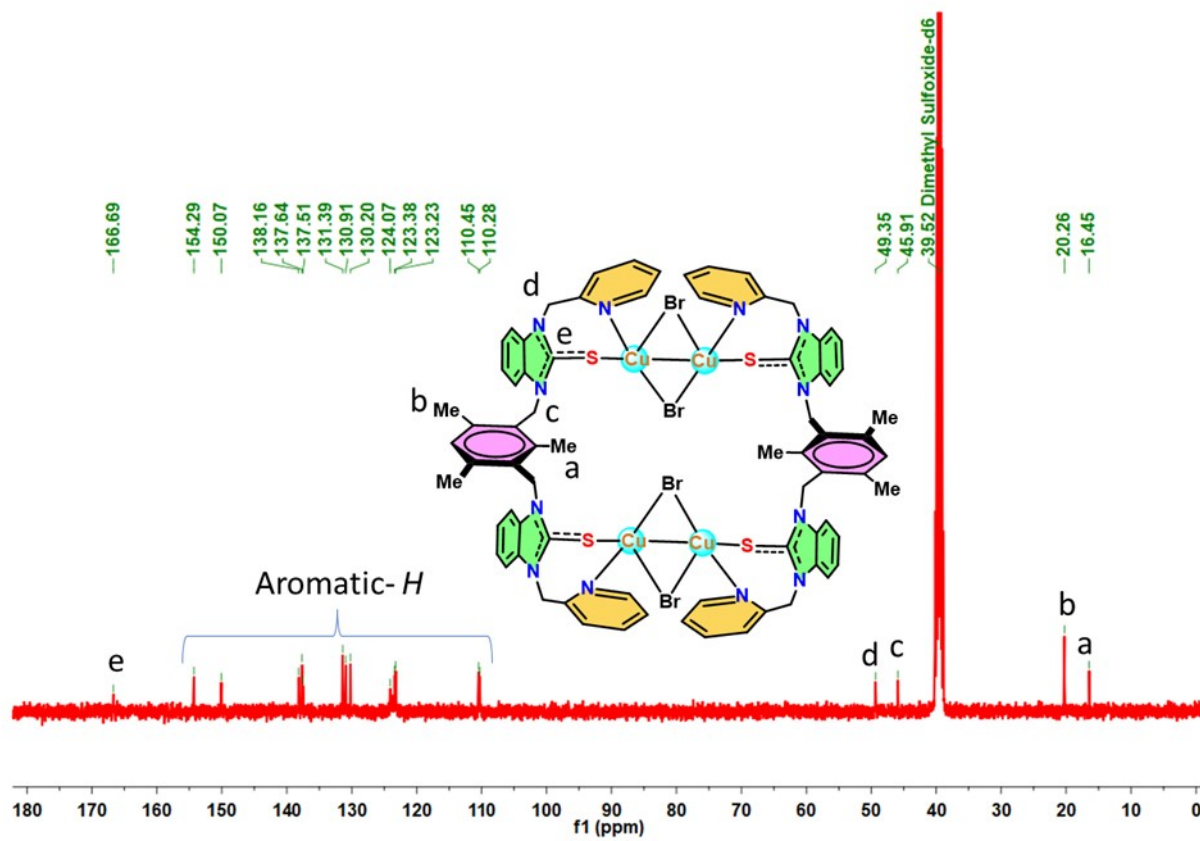

Figure S5.  $^{13}\text{C}$  NMR spectrum of **1** in  $\text{DMSO-}d_6$  at  $25\text{ }^\circ\text{C}$

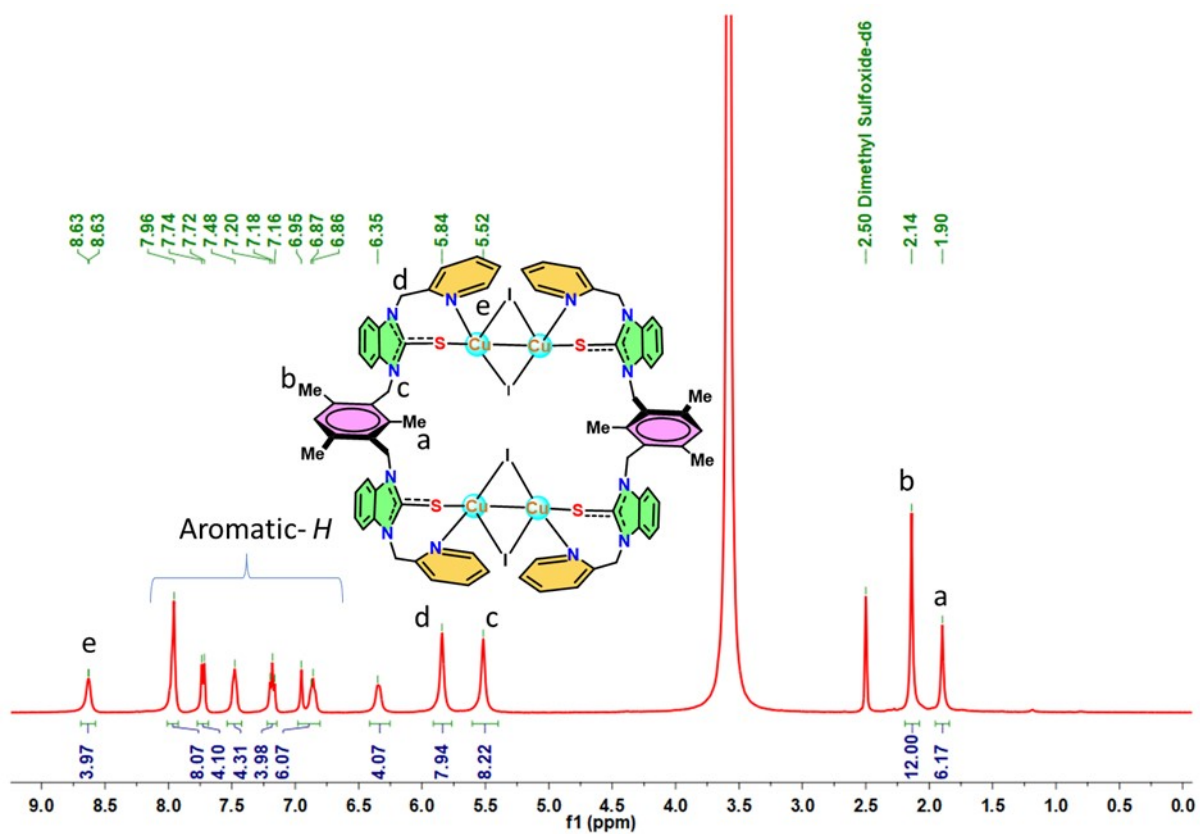

**Figure S6.**  $^1\text{H}$  NMR spectrum of **2** in  $\text{DMSO-}d_6$  at  $25\text{ }^\circ\text{C}$ .



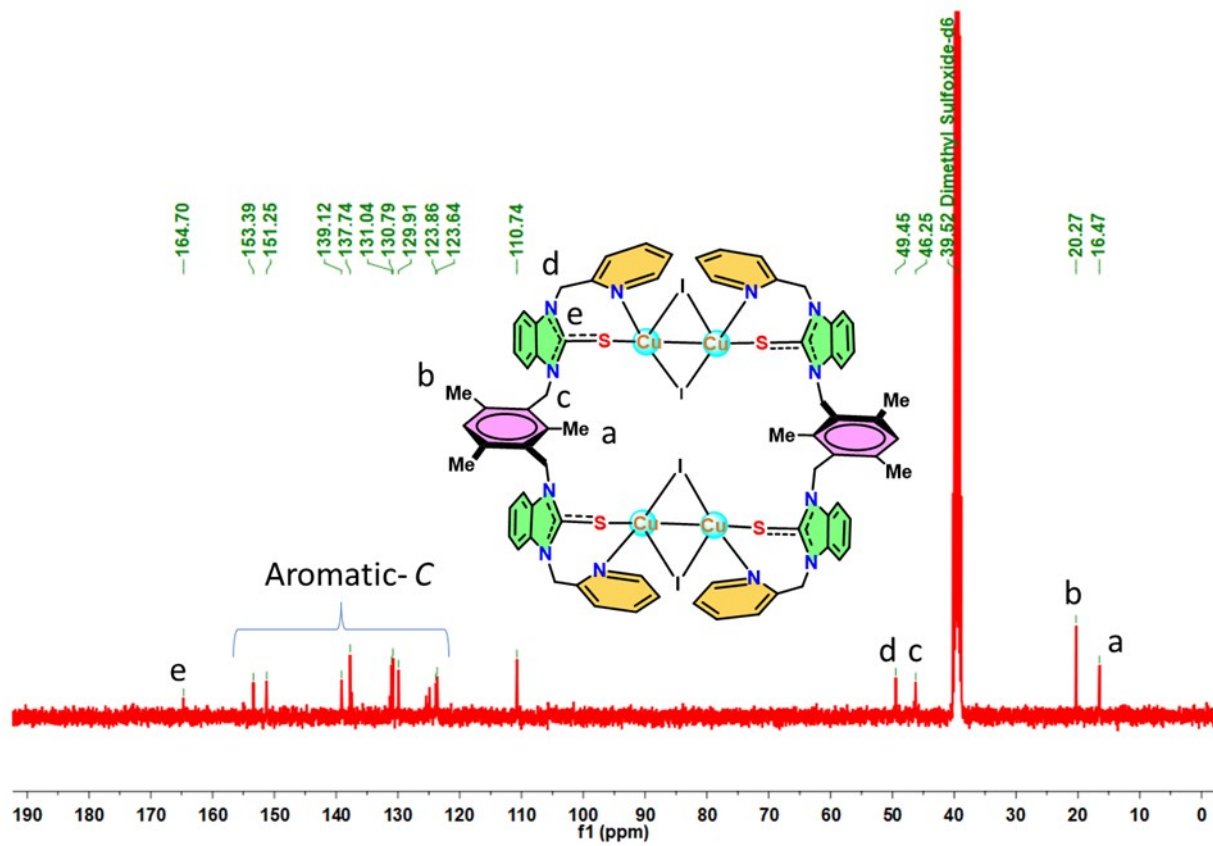

Figure S7.  $^{13}\text{C}$  NMR spectrum of **2** in  $\text{DMSO-}d_6$  at  $25\text{ }^\circ\text{C}$ .

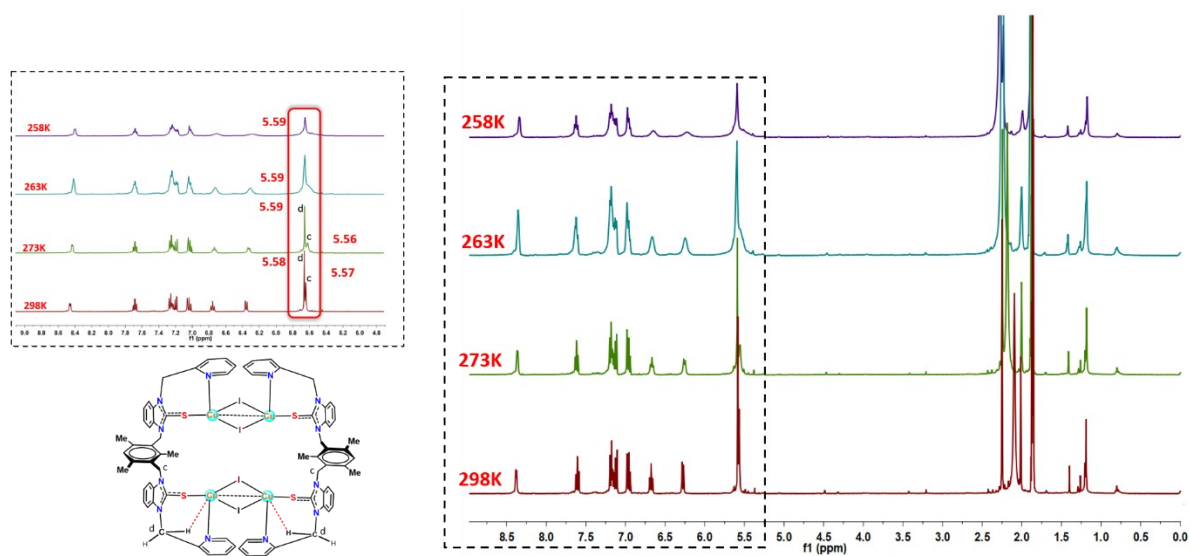

**Figure S8.**  $^1\text{H}$  NMR spectrum of **2** in  $\text{CD}_3\text{CN}$  at variable temperatures (258, 263, 273, and 298K).

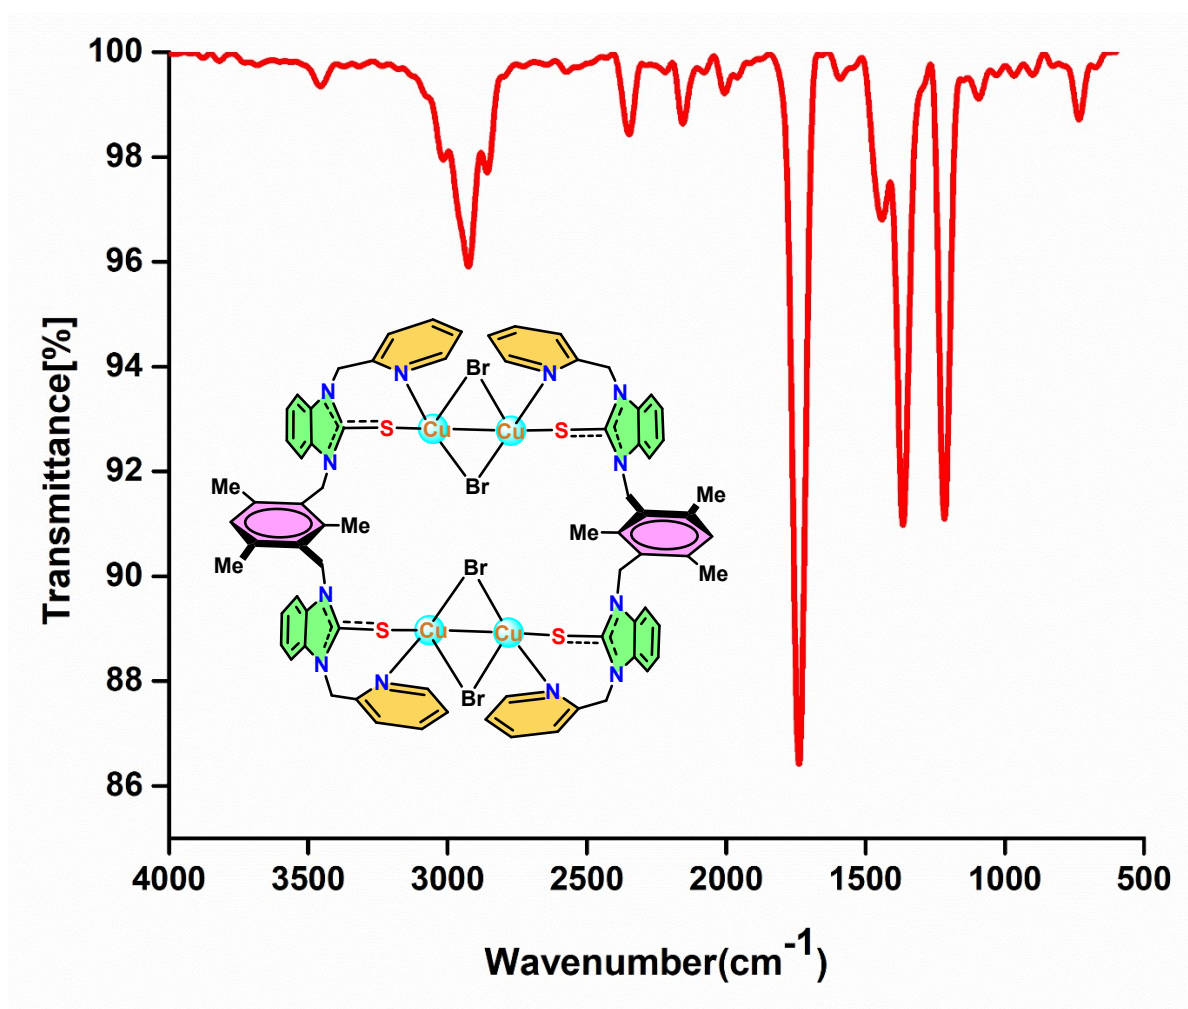

Figure S9. FT-IR spectrum of 1 at 25 °C.

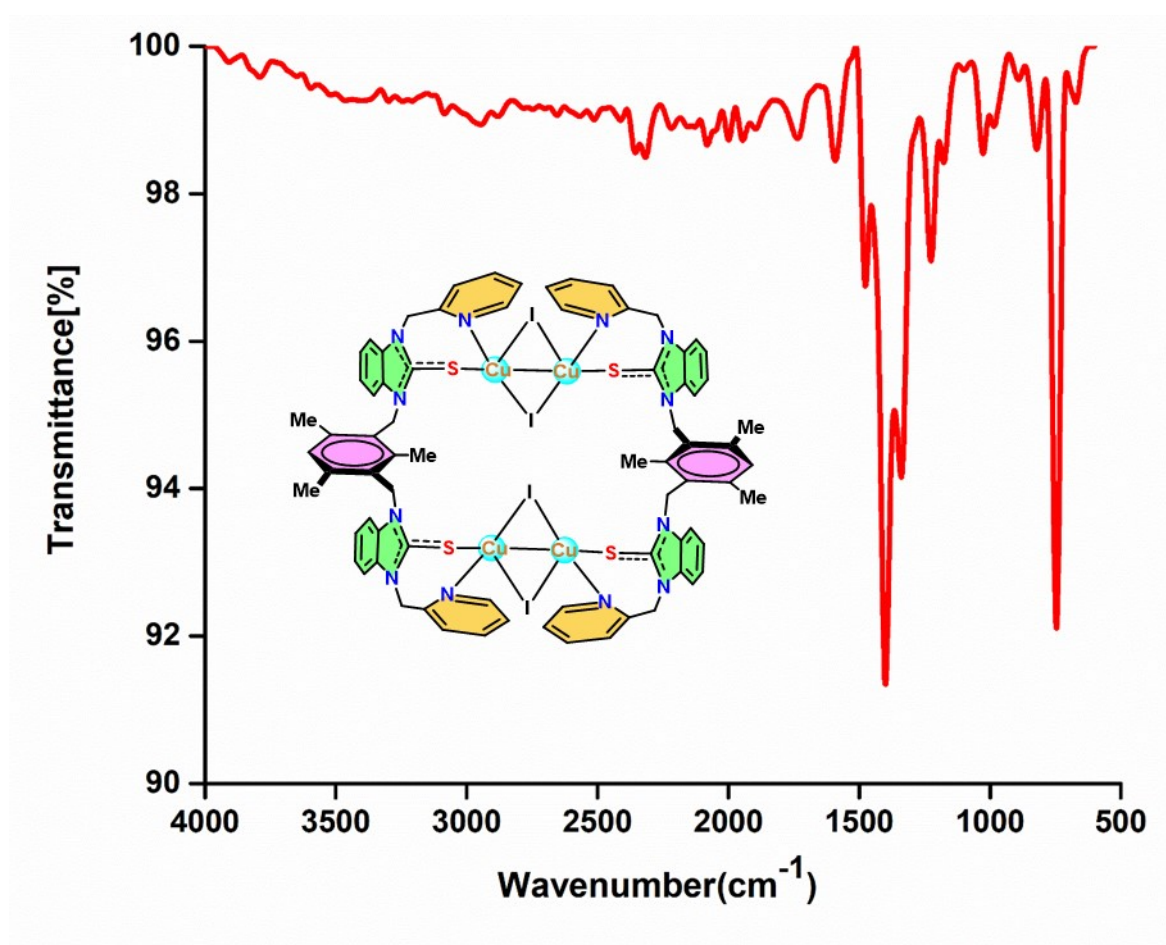

Figure S10. FT-IR spectrum of **2** at 25 °C.

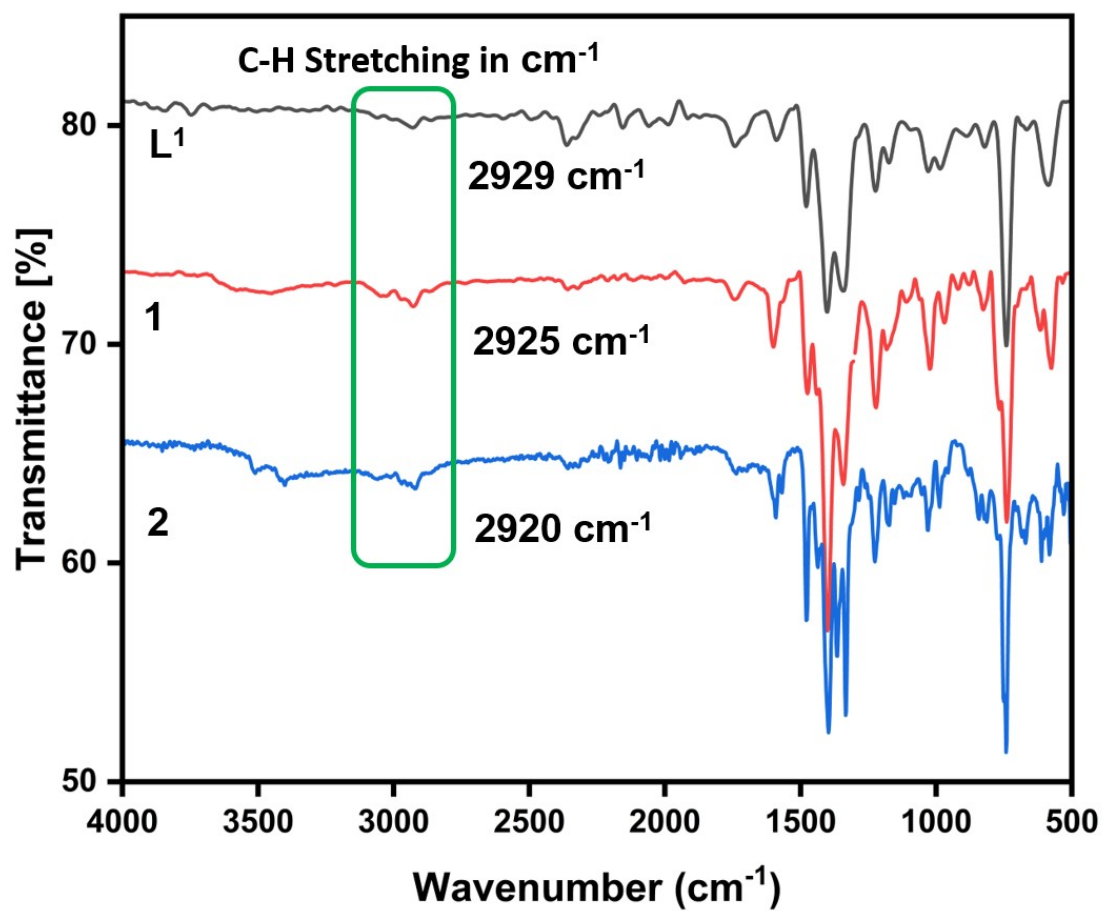

Figure S11. FT-IR spectrum of L<sup>1</sup>, 1 and 2 at 25 °C.

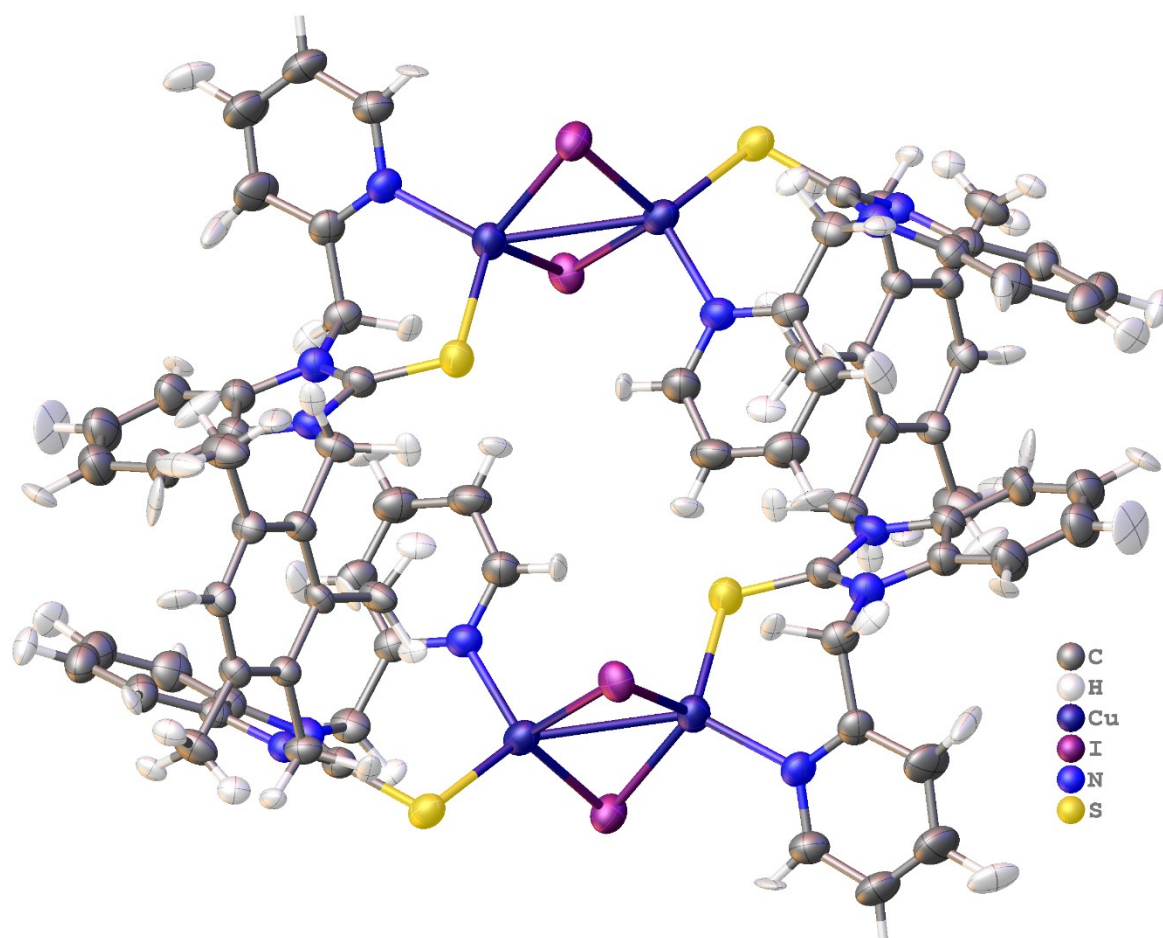

**Figure S12.** HAR-refined molecular structure of **2** with the PBE/def2-TZVPP model at full resolution 120 K.

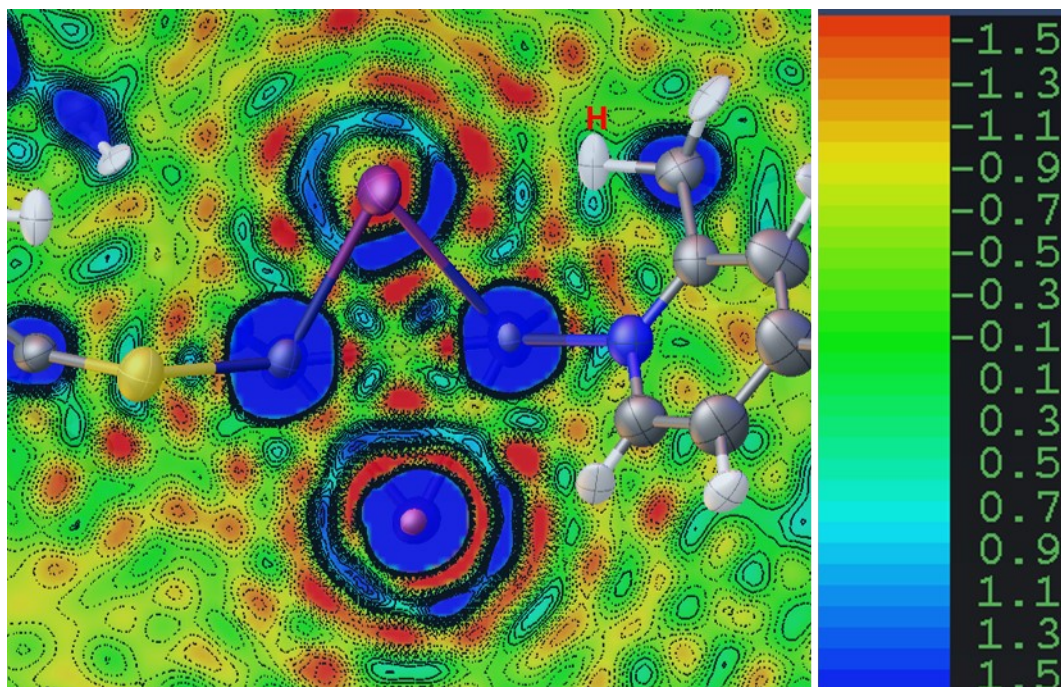

**Figure S13.** Fourier difference electron density maps showing the electron density (contours in the red to blue region (in  $e\text{\AA}^{-3}$ ) associated with the H-atom and Cu-atom in  $\text{Cu}\cdots\text{H-C}$  interaction at 120 K.

**Table S1:** The structural parameters of **1** and **2**.

|                                             | <b>1</b>                                                                                      | <b>2</b>                                                                                      |
|---------------------------------------------|-----------------------------------------------------------------------------------------------|-----------------------------------------------------------------------------------------------|
| Empirical formula                           | C <sub>37</sub> H <sub>34</sub> Br <sub>2</sub> Cu <sub>2</sub> N <sub>6</sub> S <sub>2</sub> | C <sub>74</sub> H <sub>68</sub> Cu <sub>4</sub> I <sub>4</sub> N <sub>12</sub> S <sub>4</sub> |
| Formula weight                              | 912.29                                                                                        | 2015.40                                                                                       |
| Temperature/K                               | 297                                                                                           | 223                                                                                           |
| Crystal system                              | triclinic                                                                                     | Triclinic                                                                                     |
| Space Group                                 | P $\bar{1}$                                                                                   | P $\bar{1}$                                                                                   |
| a/Å                                         | 10.3032(7)                                                                                    | 10.1474(12)                                                                                   |
| b/Å                                         | 14.4037(10)                                                                                   | 14.6541(16)                                                                                   |
| c/Å                                         | 15.4154(10)                                                                                   | 15.5293(18)                                                                                   |
| $\alpha$ /°                                 | 73.897(2)                                                                                     | 108.219(4)                                                                                    |
| $\beta$ /°                                  | 77.002(2)                                                                                     | 99.996(4)                                                                                     |
| $\gamma$ /°                                 | 89.100(2)                                                                                     | 90.325(4)                                                                                     |
| Volume/Å <sup>3</sup>                       | 2139.0(3)                                                                                     | 2155.7(4)                                                                                     |
| Z                                           | 2                                                                                             | 1                                                                                             |
| $\rho_{\text{calc}}$ /cm <sup>3</sup>       | 1.416                                                                                         | 1.552                                                                                         |
| $\mu$ /mm <sup>-1</sup>                     | 2.977                                                                                         | 2.547                                                                                         |
| F(000)                                      | 915.0                                                                                         | 988.0                                                                                         |
| Crystal size/mm <sup>3</sup>                | 0.24 × 0.19 × 0.17                                                                            | 0.312 × 0.095 × 0.056                                                                         |
| Radiation                                   | MoK $\alpha$ ( $\lambda$ = 0.71073                                                            | MoK $\alpha$ ( $\lambda$ = 0.71073)                                                           |
| 2 $\theta$ range for data collection/°      | 3.462 to 54.392                                                                               | 4.084 to 54.562                                                                               |
| Index ranges                                | -13 ≤ h ≤ 13, -18 ≤ k ≤ 18,<br>-19 ≤ l ≤ 19                                                   | -13 ≤ h ≤ 13, -18 ≤ k ≤ 18, -<br>19 ≤ l ≤ 19                                                  |
| Reflections collected                       | 52970                                                                                         | 49382                                                                                         |
| Independent reflections                     | 9496 [R <sub>int</sub> = 0.1104,<br>R <sub>sigma</sub> = 0.0800]                              | 9602 [R <sub>int</sub> = 0.0598, R <sub>sigma</sub> =<br>0.0459]                              |
| Data/restraints/parameters                  | 9496/0/447                                                                                    | 9602/0/439                                                                                    |
| Goodness-of-fit on F <sup>2</sup>           | 1.019                                                                                         | 1.066                                                                                         |
| Final R indexes [I >= 2 $\sigma$ (I)]       | R <sub>1</sub> = 0.0445, wR <sub>2</sub> = 0.1082                                             | R <sub>1</sub> = 0.0357, wR <sub>2</sub> = 0.0791                                             |
| Final R indexes [all data]                  | R <sub>1</sub> = 0.0769, wR <sub>2</sub> = 0.1212                                             | R <sub>1</sub> = 0.0562, wR <sub>2</sub> = 0.0854                                             |
| Largest diff. peak/hole / e Å <sup>-3</sup> | 0.69/-0.76                                                                                    | 1.34/-0.81                                                                                    |



**Table S2:** The structural parameters of **1** and **2** at 120K.

|                                           | <b>1</b>                                                                                      | <b>2</b>                                                                                     | <b>2<sup>a</sup></b>                                                                          |
|-------------------------------------------|-----------------------------------------------------------------------------------------------|----------------------------------------------------------------------------------------------|-----------------------------------------------------------------------------------------------|
| Empirical formula                         | C <sub>37</sub> H <sub>34</sub> Br <sub>2</sub> Cu <sub>2</sub> N <sub>6</sub> S <sub>2</sub> | C <sub>37</sub> H <sub>34</sub> Cu <sub>2</sub> I <sub>2</sub> N <sub>6</sub> S <sub>2</sub> | C <sub>74</sub> H <sub>68</sub> Cu <sub>4</sub> I <sub>4</sub> N <sub>12</sub> S <sub>4</sub> |
| Formula weight                            | 912.29                                                                                        | 1007.755                                                                                     | 2015.40                                                                                       |
| Temperature/K                             | 120                                                                                           | 120.00                                                                                       | 120                                                                                           |
| Crystal system                            | triclinic                                                                                     | triclinic                                                                                    | Triclinic                                                                                     |
| Space Group                               | P $\bar{1}$                                                                                   | P $\bar{1}$                                                                                  | P $\bar{1}$                                                                                   |
| a/Å                                       | 10.2301(10)                                                                                   | 10.2882(14)                                                                                  | 10.2882(14)                                                                                   |
| b/Å                                       | 14.3455(16)                                                                                   | 14.6183(17)                                                                                  | 14.6183(17)                                                                                   |
| c/Å                                       | 15.4107(18)                                                                                   | 15.560(2)                                                                                    | 15.560(2)                                                                                     |
| $\alpha$ /°                               | 73.904(4)                                                                                     | 72.964(4)                                                                                    | 72.964(4)                                                                                     |
| $\beta$ /°                                | 77.156(4)                                                                                     | 78.573(5)                                                                                    | 78.573(5)                                                                                     |
| $\gamma$ /°                               | 88.719(4)                                                                                     | 89.436(4)                                                                                    | 89.436(4)                                                                                     |
| Volume/Å <sup>3</sup>                     | 2116.7(4)                                                                                     | 2190.3(5)                                                                                    | 2190.3 (5)                                                                                    |
| Z                                         | 2                                                                                             | 2                                                                                            | 1                                                                                             |
| $\rho_{\text{calc}}$ /cm <sup>3</sup>     | 1.434                                                                                         | 1.528                                                                                        | 1.558                                                                                         |
| $\mu$ /mm <sup>-1</sup>                   | 3.022                                                                                         | 2.506                                                                                        | 2.506                                                                                         |
| F(000)                                    | 917.6                                                                                         | 988.8                                                                                        | 988.8                                                                                         |
| Crystal size/mm <sup>3</sup>              | 0.12 × 0.1 × 0.08                                                                             | 0.12 × 0.09 × 0.08                                                                           | 0.12 × 0.09 × 0.08                                                                            |
| Radiation                                 | Mo K $\alpha$ ( $\lambda$ =<br>0.71073)                                                       | Mo K $\alpha$ ( $\lambda$ =<br>0.71073)                                                      | MoK $\alpha$ ( $\lambda$ =<br>0.71073)                                                        |
| 2 $\Theta$ range for data<br>collection/° | 4.08 to 53                                                                                    | 4.04 to 54.32                                                                                | 4.04 to 54.32                                                                                 |
| Index ranges                              | -10 ≤ h ≤ 13, -18 ≤<br>k ≤ 18, -19 ≤ l ≤ 19                                                   | -13 ≤ h ≤ 13, -18 ≤<br>k ≤ 17, -19 ≤ l ≤ 19                                                  | -13 ≤ h ≤ 13, -18 ≤<br>k ≤ 18, -19 ≤ l ≤<br>19                                                |
| Reflections collected                     | 49046                                                                                         | 60706                                                                                        | 60706                                                                                         |
| Independent reflections                   | 8741 [R <sub>int</sub> =<br>0.1001, R <sub>sigma</sub> =<br>0.0812]                           | 9699 [R <sub>int</sub> =<br>0.0820, R <sub>sigma</sub> =<br>0.0541]                          | 9699 [R <sub>int</sub> =<br>0.0820, R <sub>sigma</sub> =<br>0.0541]                           |
| Data/restraints/parameters                | 8741/0/446                                                                                    | 9699/0/433                                                                                   | 9699/78/736                                                                                   |
| Goodness-of-fit on F <sup>2</sup>         | 1.006                                                                                         | 1.016                                                                                        | 1.020                                                                                         |

---

|                                                  |                                    |                                    |                                    |
|--------------------------------------------------|------------------------------------|------------------------------------|------------------------------------|
| Final R indexes [ $I \geq 2\sigma$<br>(I)]       | $R_1 = 0.0464,$<br>$wR_2 = 0.0972$ | $R_1 = 0.0379,$<br>$wR_2 = 0.0804$ | $R_1 = 0.0348,$<br>$wR_2 = 0.0636$ |
| Final R indexes [all data]                       | $R_1 = 0.0915,$<br>$wR_2 = 0.1214$ | $R_1 = 0.0612,$<br>$wR_2 = 0.0894$ | $R_1 = 0.0584,$<br>$wR_2 = 0.0710$ |
| Largest diff. peak/hole / e<br>$\text{\AA}^{-3}$ | 1.01/-1.22                         | 1.70/-1.21                         | 1.68/-1.20                         |

---

<sup>a</sup>Hirshfield atom refinement using NoSpher A2 with PBE/def2-TZVPP model.

**Table S3:** Selective bond lengths and bond angles of **2** at 120K (H atoms anisotropic refinement using NoSpherA2 in Olex2).

| <b>2(X=I)</b><br><i>Bond length [<math>\text{\AA}</math>]</i> |             |
|---------------------------------------------------------------|-------------|
| Cu(1) – S(1)                                                  | 2.3173(10)  |
| Cu(1)- Cu(2)                                                  | 2.8959(7)   |
| Cu(1)- X(1)                                                   | 2.6723(6)   |
| Cu(1)-N(3)                                                    | 2.059(3)    |
| C(1)-S(1)                                                     | 1.675(4)    |
| Cu(2)···H(23A)                                                | 2.490       |
| Cu(1)···H(6B)                                                 | 2.719       |
| <b>2(X=I)</b><br><i>Bond angle [<math>^\circ</math>]</i>      |             |
| C(1)-S(1)-Cu(2)                                               | 108.63(11)  |
| S(1)-Cu(1)-X(1)                                               | 118.29(3)   |
| N(3)-Cu(1)-X(1)                                               | 109.74(8)   |
| X(1)-Cu(1)-X(2)                                               | 110.512(17) |
| Cu(1)-X(1)-Cu(2)                                              | 67.040(15)  |

## Computational Methods

### Details of Topology Analysis

The bond path represents the maximal gradient path connecting the bond critical point (BCP) with two associated local maxima of charge density. The BCP is characterized by a minimum charge density along the bond direction and a maximum charge density perpendicular to it. The BCP can be described by the number of zero eigenvalues of the associated Hessian matrix and the algebraic sum of their signs. A bond critical point is denoted as (3, -1), indicating one positive curvature of charge density along the bond path and two negative curvatures perpendicular to the bond path. The characteristics of this BCP are discussed in the main manuscript using the parameters  $\rho(r)$  and  $\nabla^2\rho(r)$ . In addition to bond critical points, there are other types of non-degenerate critical points: (3, -3), (3, +1), and (3, +3). The (3, -3) point corresponds to the positions of nuclei (local maxima of charge density), the (3, +1) point denotes a ring critical point, and the (3, +3) point represents a cage critical point.

Another criterion mentioned in the main manuscript is mutual penetration. This parameter is derived from each interacting atom's non-bonded radius (NBR), specifically the NBR of H and Ag atoms, and the distance between them. NBR is the shortest distance between the nucleus and the  $\rho(r) = 0.001$  a.u. Isosurface. Mutual penetration is calculated as the difference between the sum of the NBRs of the interacting atoms and the intermolecular distance. The mutual penetration is given by  $\Delta r_H = [(NBR_{Cu} + NBR_{H}) - d_{Cu \cdots H}]/0.529$  a.u., where all distances are measured in Å.

**Table S3:** Optimized Cartesian Co-ordinates of **2** (Cartesian coordinates of the optimized structures (in Å).

|    |              |              |              |
|----|--------------|--------------|--------------|
| I  | -0.458142152 | -2.861401162 | -1.916390097 |
| I  | 0.318863116  | 5.832405421  | -1.761292087 |
| Cu | -1.684668264 | -3.850879204 | 0.299979062  |
| Cu | -1.075450024 | 4.299660368  | -0.000546960 |
| S  | -3.885580446 | -4.734090214 | -0.567498000 |
| S  | -2.622136172 | 2.615651285  | -1.118740041 |
| N  | -6.141540557 | -3.134387046 | -0.196939973 |
| N  | -4.500144297 | 3.121569363  | 0.910571104  |
| N  | -5.390939407 | 2.323863331  | -0.975862030 |
| N  | -5.028423500 | -3.536698104 | 1.694402162  |
| N  | -2.109504264 | -2.507310096 | 1.847912174  |
| N  | -2.315776079 | 5.520849458  | 1.157288122  |
| C  | -6.848122573 | -1.741368929 | -2.202467117 |
| C  | -5.993431518 | -0.613001867 | -2.050110108 |
| C  | -6.457867582 | -3.108606034 | -1.642344080 |
| H  | -7.251990650 | -3.836874067 | -1.826283091 |
| H  | -5.558307534 | -3.491118083 | -2.140237116 |
| C  | -8.050557643 | -1.628939888 | -2.948078173 |
| C  | -6.380185473 | 0.643923234  | -2.593545149 |
| C  | -2.967519330 | -2.807899099 | 2.867830248  |
| C  | -5.024964501 | -3.778608117 | 0.325676064  |
| C  | -7.567450565 | 0.752895271  | -3.365108200 |
| C  | -5.891506423 | 3.057112393  | 1.111595122  |
| C  | -3.955649430 | -3.940245155 | 2.624096229  |
| H  | -3.435717416 | -4.798271233 | 2.185761198  |
| H  | -4.415588472 | -4.256400171 | 3.566214298  |
| C  | -6.878854595 | -2.536261987 | 0.842125102  |

|   |              |              |              |
|---|--------------|--------------|--------------|
| C | -8.372945652 | -0.388146793 | -3.528091215 |
| H | -9.279994722 | -0.308483765 | -4.123529256 |
| C | -4.188086288 | 2.690148329  | -0.375518987 |
| C | -2.944464311 | -2.092562051 | 4.077125333  |
| H | -3.616989368 | -2.372020053 | 4.883456393  |
| C | -6.459121467 | 2.555501374  | -0.085847966 |
| C | -4.666263402 | -0.755548910 | -1.321206056 |
| H | -4.788863409 | -0.646413897 | -0.234414976 |
| H | -3.938240335 | -0.003560874 | -1.633220075 |
| H | -4.204660394 | -1.731230993 | -1.499226066 |
| C | -8.087987672 | -1.826494905 | 0.850571104  |
| H | -8.632265735 | -1.621689874 | -0.064054964 |
| C | -6.164806575 | -2.783116019 | 2.042195188  |
| C | -8.999097754 | -2.799662952 | -3.170146188 |
| H | -8.523767730 | -3.614519021 | -3.732332228 |
| H | -9.874454822 | -2.475794908 | -3.742765228 |
| H | -9.364031826 | -3.227142976 | -2.225883120 |
| C | -3.269695161 | 5.022151469  | 1.996766183  |
| C | -5.509297413 | 1.882011303  | -2.389732129 |
| H | -4.483732330 | 1.716731261  | -2.733434155 |
| H | -5.901935396 | 2.725722370  | -2.964029173 |
| C | -3.521282218 | 3.521645371  | 1.940170179  |
| H | -2.576966163 | 3.008955311  | 1.731960168  |
| H | -3.895627252 | 3.166330355  | 2.906322252  |
| C | -2.054620031 | 6.854428567  | 1.165541123  |
| H | -1.289234966 | 7.189428564  | 0.471809075  |
| C | -8.564805690 | -1.371701858 | 2.095099191  |
| H | -9.496701749 | -0.814123799 | 2.134219196  |
| C | -2.039849223 | -1.024760993 | 4.233221344  |

|   |              |              |              |
|---|--------------|--------------|--------------|
| H | -2.002825205 | -0.464658954 | 5.163828412  |
| C | -1.254094178 | -1.460936044 | 1.990649186  |
| H | -0.607015121 | -1.250558046 | 1.145690123  |
| C | -6.636172586 | -2.328375974 | 3.280724278  |
| H | -6.093550530 | -2.513394999 | 4.201857342  |
| C | -6.685259438 | 3.383173438  | 2.219273199  |
| H | -6.254975415 | 3.757712453  | 3.141847266  |
| C | -1.190513150 | -0.691746993 | 3.164976270  |
| H | -0.493532082 | 0.138083053  | 3.218517270  |
| C | -8.000047568 | 2.048139372  | -4.040143252 |
| H | -8.134129547 | 2.873914437  | -3.328084197 |
| H | -8.953371654 | 1.905328387  | -4.559683289 |
| H | -7.268247504 | 2.383111381  | -4.787277306 |
| C | -7.845970574 | 2.382343391  | -0.208162975 |
| H | -8.292190611 | 1.984009376  | -1.110237041 |
| C | -2.721701057 | 7.746128639  | 2.021417186  |
| H | -2.473088013 | 8.802338699  | 1.996688183  |
| C | -7.852507660 | -1.618765894 | 3.291014278  |
| H | -8.248543648 | -1.253940859 | 4.234943345  |
| C | -3.966533193 | 5.860133568  | 2.887319248  |
| H | -4.705124253 | 5.439199525  | 3.562426299  |
| C | -8.646274592 | 2.721282435  | 0.899394103  |
| H | -9.724181660 | 2.600507454  | 0.830334101  |
| C | -8.076698575 | 3.209329457  | 2.096973193  |
| H | -8.721140578 | 3.456859492  | 2.936309250  |
| C | -3.691822138 | 7.239505665  | 2.903124248  |
| H | -4.219193162 | 7.898475700  | 3.587620301  |
| I | 0.458137053  | 2.861551226  | 1.916468177  |
| I | -0.318798215 | -5.832437383 | 1.761237169  |

|    |             |              |              |
|----|-------------|--------------|--------------|
| Cu | 1.684672164 | 3.850894264  | -0.299950981 |
| Cu | 1.075462920 | -4.299590305 | 0.000547041  |
| S  | 3.885635343 | 4.734071275  | 0.567430081  |
| S  | 2.622164076 | -2.615605220 | 1.118775120  |
| N  | 6.141547489 | 3.134297108  | 0.196896055  |
| N  | 4.500149197 | -3.121464305 | -0.910573025 |
| N  | 5.390970258 | -2.323838269 | 0.975881112  |
| N  | 5.028386400 | 3.536530164  | -1.694438082 |
| N  | 2.109440164 | 2.507218157  | -1.847807090 |
| N  | 2.315782985 | -5.520718434 | -1.157362043 |
| C  | 6.848169511 | 1.741356990  | 2.202455200  |
| C  | 5.993479408 | 0.612986929  | 2.050115188  |
| C  | 6.457912509 | 3.108577098  | 1.642295157  |
| H  | 7.252046584 | 3.836845127  | 1.826185172  |
| H  | 5.558367437 | 3.491118146  | 2.140190194  |
| C  | 8.050607544 | 1.628938951  | 2.948065251  |
| C  | 6.380234369 | -0.643928171 | 2.593568226  |
| C  | 2.967432233 | 2.807717162  | -2.867769165 |
| C  | 5.024963406 | 3.778501181  | -0.325722983 |
| C  | 7.567499461 | -0.752890207 | 3.365134283  |
| C  | 5.891511292 | -3.057030334 | -1.111601038 |
| C  | 3.955601333 | 3.940051216  | -2.624129149 |
| H  | 3.435702313 | 4.798119291  | -2.185836119 |
| H  | 4.415525373 | 4.256135227  | -3.566278217 |
| C  | 6.878819511 | 2.536098042  | -0.842158022 |
| C  | 8.372993543 | 0.388154854  | 3.528099296  |
| H  | 9.280042613 | 0.308502826  | 4.123540337  |
| C  | 4.188105184 | -2.690080266 | 0.375533067  |
| C  | 2.944326211 | 2.092300108  | -4.077015253 |



|   |             |              |              |
|---|-------------|--------------|--------------|
| H | 3.616836267 | 2.371687111  | -4.883384309 |
| C | 6.459142370 | -2.555466311 | 0.085854047  |
| C | 4.666319304 | 0.755511973  | 1.321195134  |
| H | 4.788924312 | 0.646321957  | 0.234409058  |
| H | 3.938293231 | 0.003539934  | 1.633240157  |
| H | 4.204719297 | 1.731203053  | 1.499165147  |
| C | 8.087937559 | 1.826307963  | -0.850599023 |
| H | 8.632236630 | 1.621537936  | 0.064023045  |
| C | 6.164745455 | 2.782907078  | -2.042222107 |
| C | 8.999148661 | 2.799665011  | 3.170114269  |
| H | 8.523815673 | 3.614535081  | 3.732275310  |
| H | 9.874498744 | 2.475808968  | 3.742749310  |
| H | 9.364092682 | 3.227122036  | 2.225844199  |
| C | 3.269676063 | -5.021984413 | -1.996848105 |
| C | 5.509342287 | -1.882014240 | 2.389758212  |
| H | 4.483781231 | -1.716734204 | 2.733470239  |
| H | 5.901984292 | -2.725734308 | 2.964039254  |
| C | 3.521275116 | -3.521484311 | -1.940181101 |
| H | 2.576966063 | -3.008796251 | -1.731936085 |
| H | 3.895614155 | -3.166125293 | -2.906319166 |
| C | 2.054623931 | -6.854297490 | -1.165670046 |
| H | 1.289260869 | -7.189328496 | -0.471927993 |
| C | 8.564717582 | 1.371446922  | -2.095117109 |
| H | 9.496604645 | 0.813853855  | -2.134234114 |
| C | 2.039683120 | 1.024509057  | -4.233013267 |
| H | 2.002617106 | 0.464348015  | -5.163583328 |
| C | 1.254002075 | 1.460851106  | -1.990447103 |
| H | 0.606943026 | 1.250545108  | -1.145455041 |
| C | 6.636071460 | 2.328097034  | -3.280740196 |

|   |             |              |              |
|---|-------------|--------------|--------------|
| H | 6.093430460 | 2.513083060  | -4.201869259 |
| C | 6.685252347 | -3.383067375 | -2.219295118 |
| H | 6.254956312 | -3.757572390 | -3.141877185 |
| C | 1.190370056 | 0.691583048  | -3.164720185 |
| H | 0.493368982 | -0.138234992 | -3.218187191 |
| C | 8.000097470 | -2.048123312 | 4.040187332  |
| H | 8.134201462 | -2.873902377 | 3.328135279  |
| H | 8.953412559 | -1.905299325 | 4.559742371  |
| H | 7.268289415 | -2.383097321 | 4.787311385  |
| C | 7.845994440 | -2.382332331 | 0.208166055  |
| H | 8.292226489 | -1.984033316 | 1.110250122  |
| C | 2.721671957 | -7.745957609 | -2.021612103 |
| H | 2.473056913 | -8.802168674 | -1.996924106 |
| C | 7.852393569 | 1.618465957  | -3.291027195 |
| H | 8.248400559 | 1.253587919  | -4.234948267 |
| C | 3.966477095 | -5.859923485 | -2.887469169 |
| H | 4.705043156 | -5.438958485 | -3.562584216 |
| C | 8.646286498 | -2.721249377 | -0.899407025 |
| H | 9.724195577 | -2.600495394 | -0.830349019 |
| C | 8.076695453 | -3.209251398 | -2.096997112 |
| H | 8.721127507 | -3.456766430 | -2.936345170 |
| C | 3.691760039 | -7.239294576 | -2.903332167 |
| H | 4.219103059 | -7.898232649 | -3.587881217 |
